# Supplementary material for: Impact of Polylactic Acid Microplastics on Performance and Microbial Dynamics in Activated Sludge System
Source: Preprints.org preprint supplement (doi:10.20944/preprints202308.0358.v1), 2023-08-04
Supplement: Supplementary file 3 [file supplementary]

Supporting Information

Impact of Polylactic Acid Microplastics on Performance and Microbial Dynamics in Activated Sludge System

**Mengbo Huang1,2,3, Dongqi Wang1,2,3,*, Shengwei Zhang3, Yuzhu Weng3,4, Kailong Li3,Renjie Huang3, Yuan Guo3, Chunbo Jiang2,3, Zhe Wang2,3, Hui Wang3, Haiyu Meng3, Yishan Lin5, Mingliang Fang6,*, Jiake Li1,2,3**

1 National Demonstration Center for Experimental Water Resources and Hydro-electric Engineering Education, Xi’an University of Technology, Xi'an, Shaanxi 710048, China

2 State Key Laboratory of Eco-hydraulics in Northwest Arid Region, Xi’an University of Technology, Xi'an, Shaanxi 710048, China

3 Department of Municipal and Environmental Engineering, Xi’an University of Technology, Xi'an, Shaanxi 710048, China; 2210421298@stu.xaut.edu.cn (M.H.); 2190421301@stu.xaut.edu.cn (S.Z.); wengyuzhu@hhu.edu.cn (Y.W.); 2200421171@stu.xaut.edu.cn (K.L.); 3210673022@stu.xaut.edu.cn (R.H.); hmeng@xaut.edu.cn (H.M.); wangzhewater@xaut.edu.cn (Z.W.); wanghui306@xaut.edu.cn(H.W.); chunbo@xaut.edu.cn (C.J.); guoyuan@xaut.edu.cn (Y.G.); sys@xaut.edu.cn (J.L.)

4 College of Environment, Hohai University, Nanjing, Jiangsu 210098 China

5 Shaanxi Key Laboratory of Earth Surface System and Environmental Carrying Capacity, College of Urban and Environmental Sciences, Northwest University, Xi'an, Shaanxi 710127, China; yshanlisa@hotmail.com (Y.L.)

6 Department of Environmental Science and Engineering, Fudan University, 220 Handan Rd., Shanghai 200433, China; mlfang@ntu.edu.sg (M.F.)

***** Correspondence: wangdq@xaut.edu.cn (D.W.); mlfang@fudan.edu.cn (M.F.)


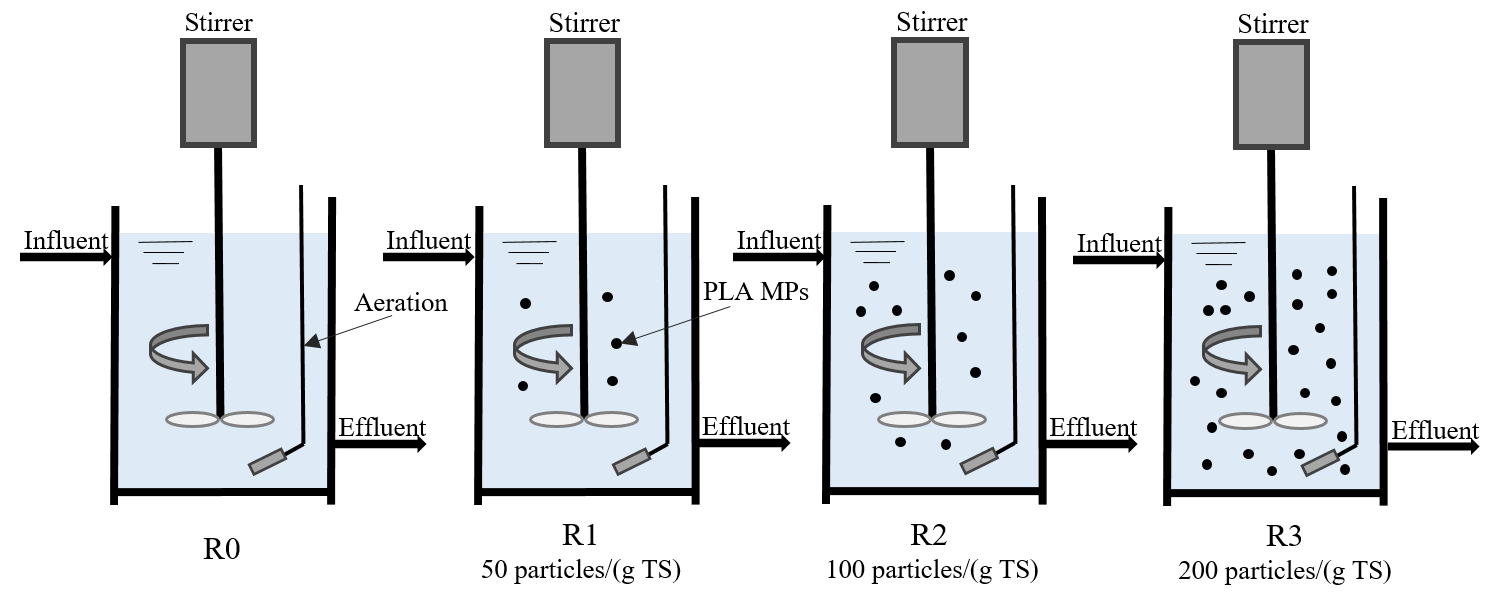


**Figure S1** SBRs used in this study.


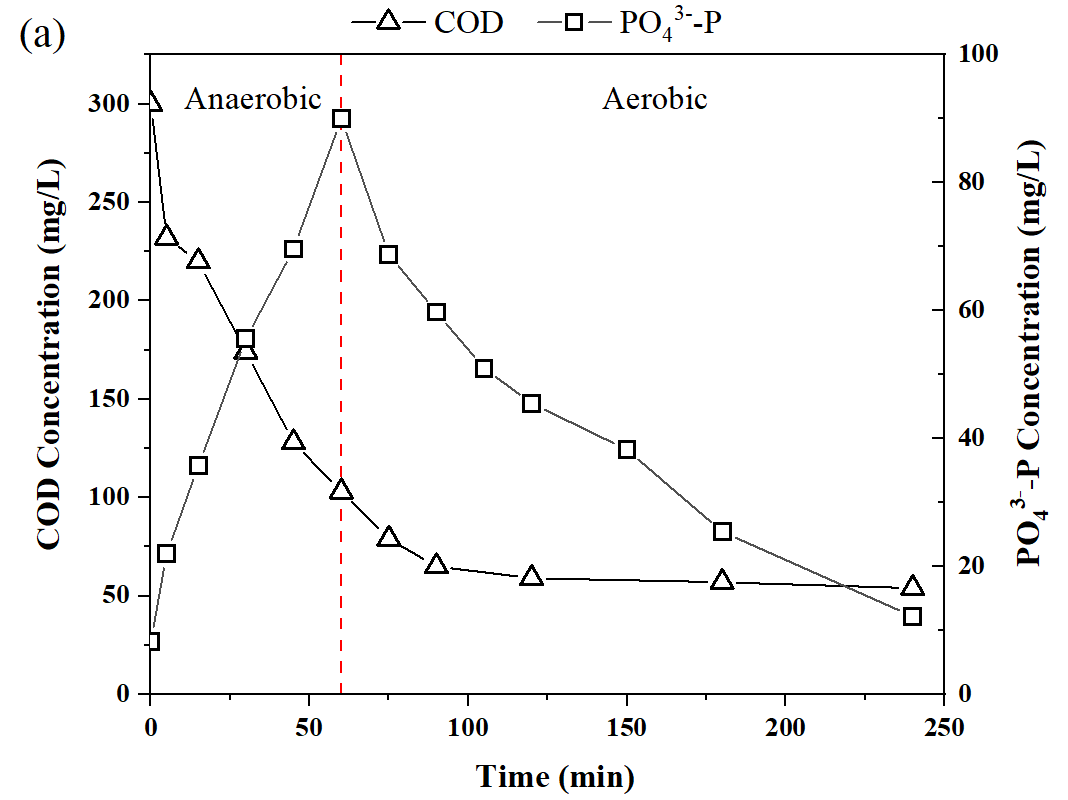

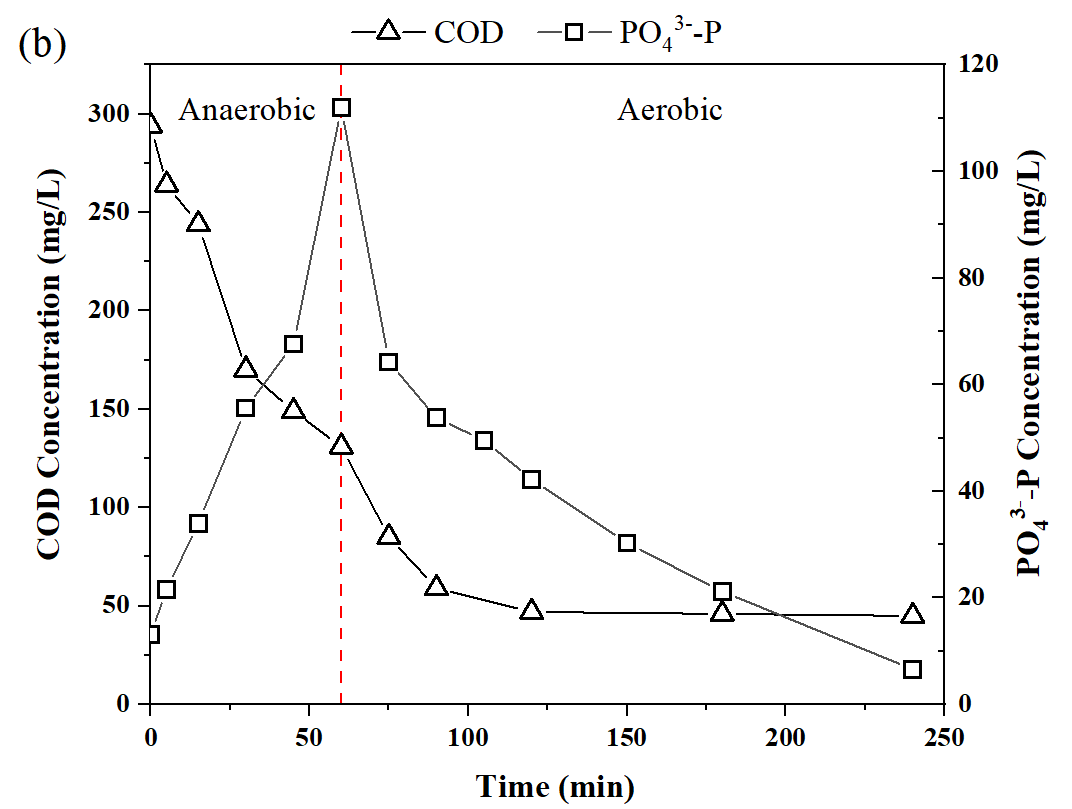


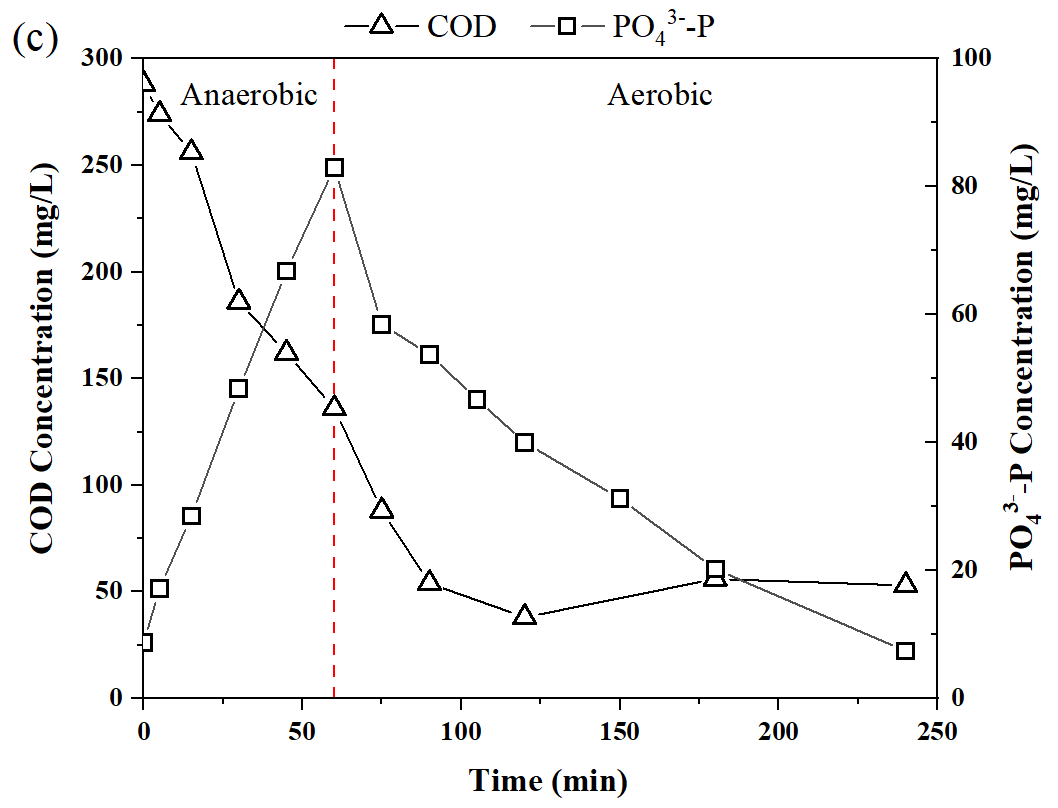

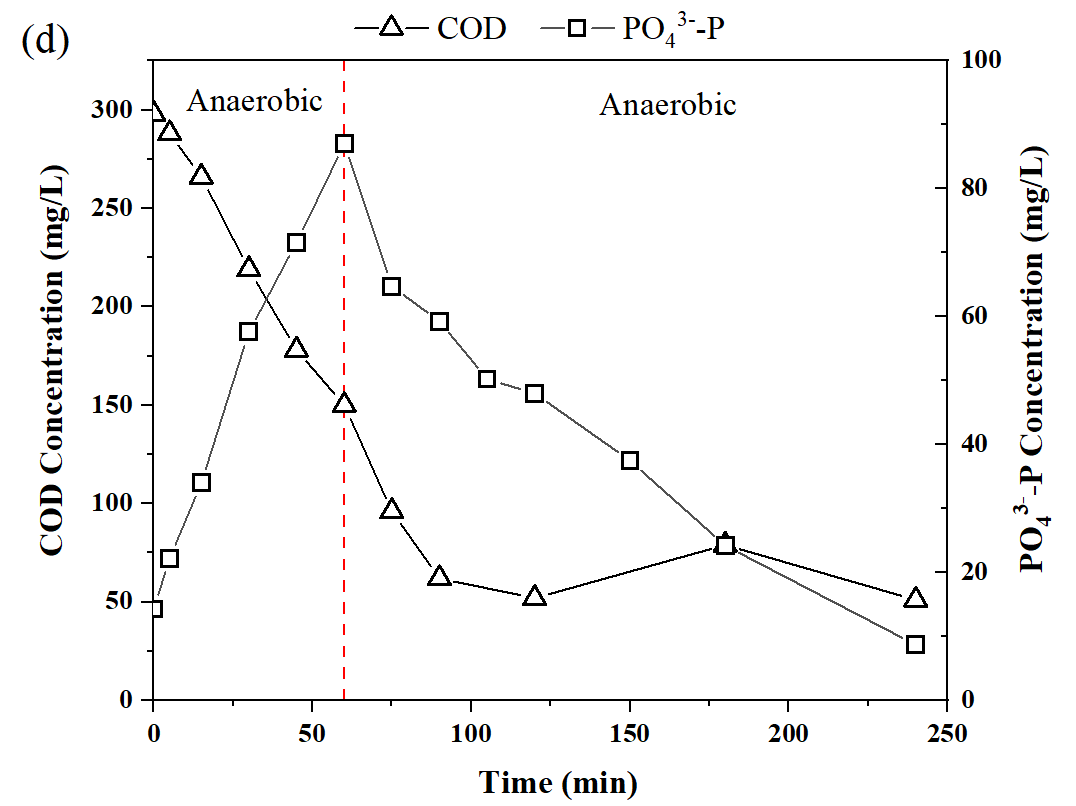


**Figure S2** Profiles of PO43--P and COD during EBPR activity batch tests with the sludge collected from (a) R0, (b) R1, (c) R2, and (d) R3.


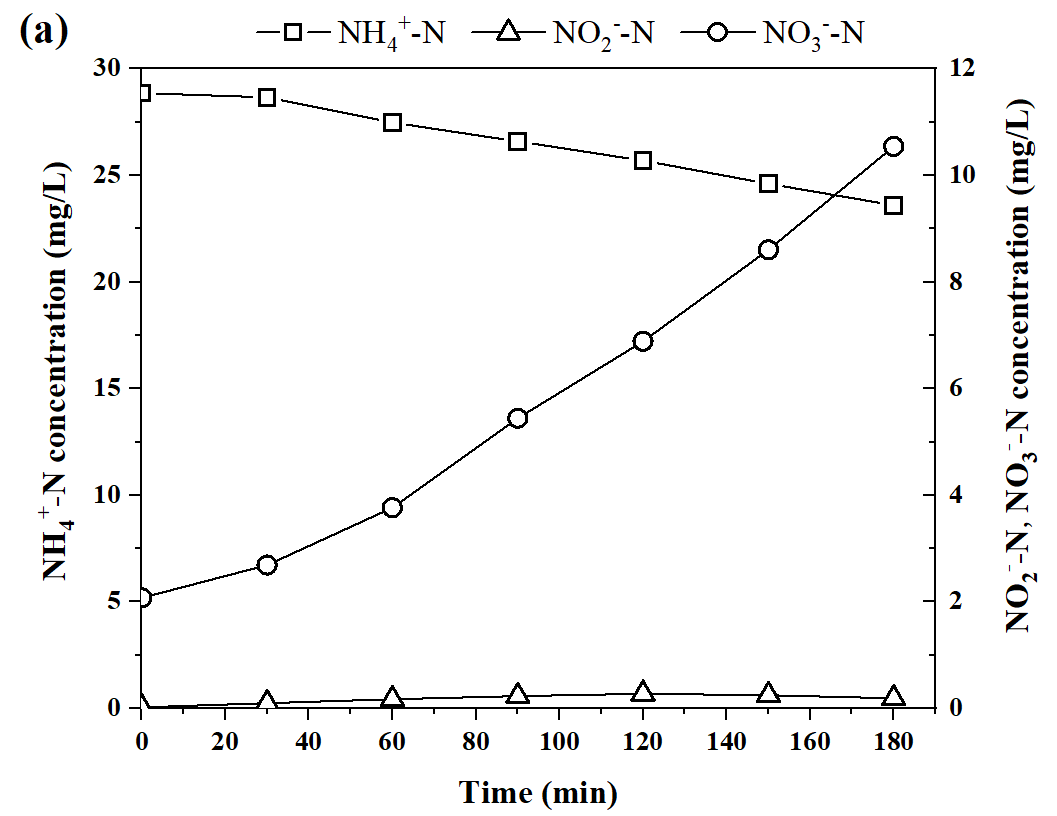

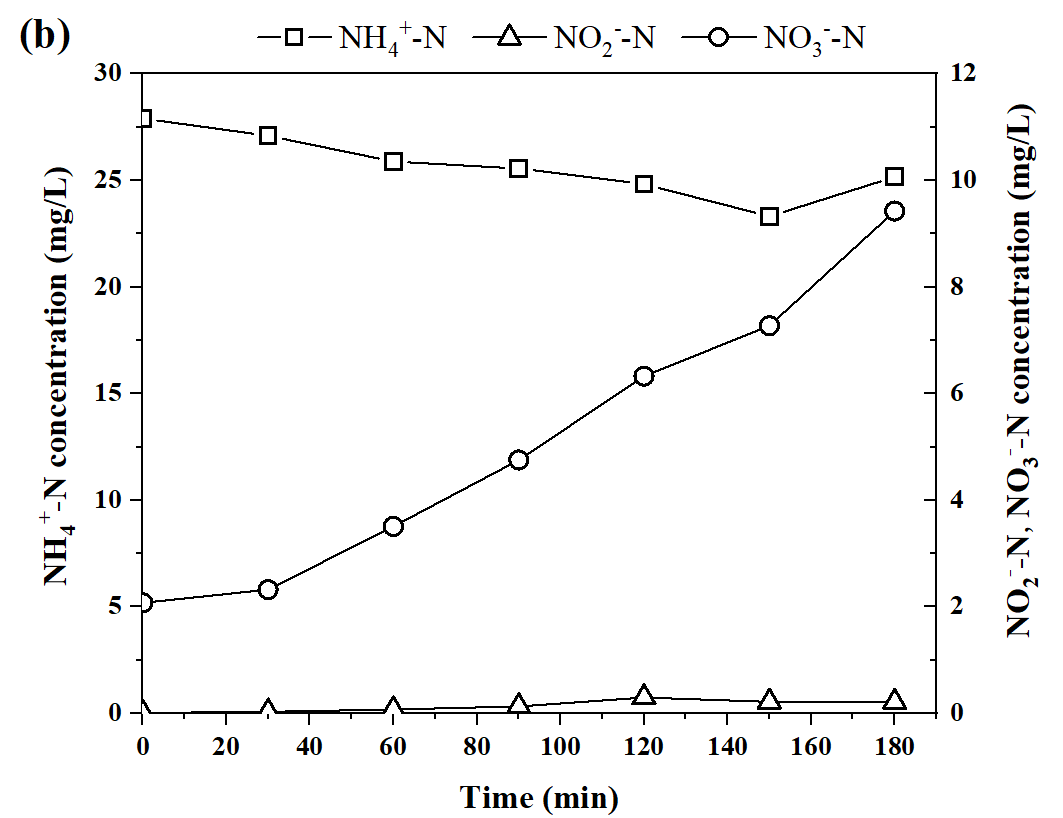


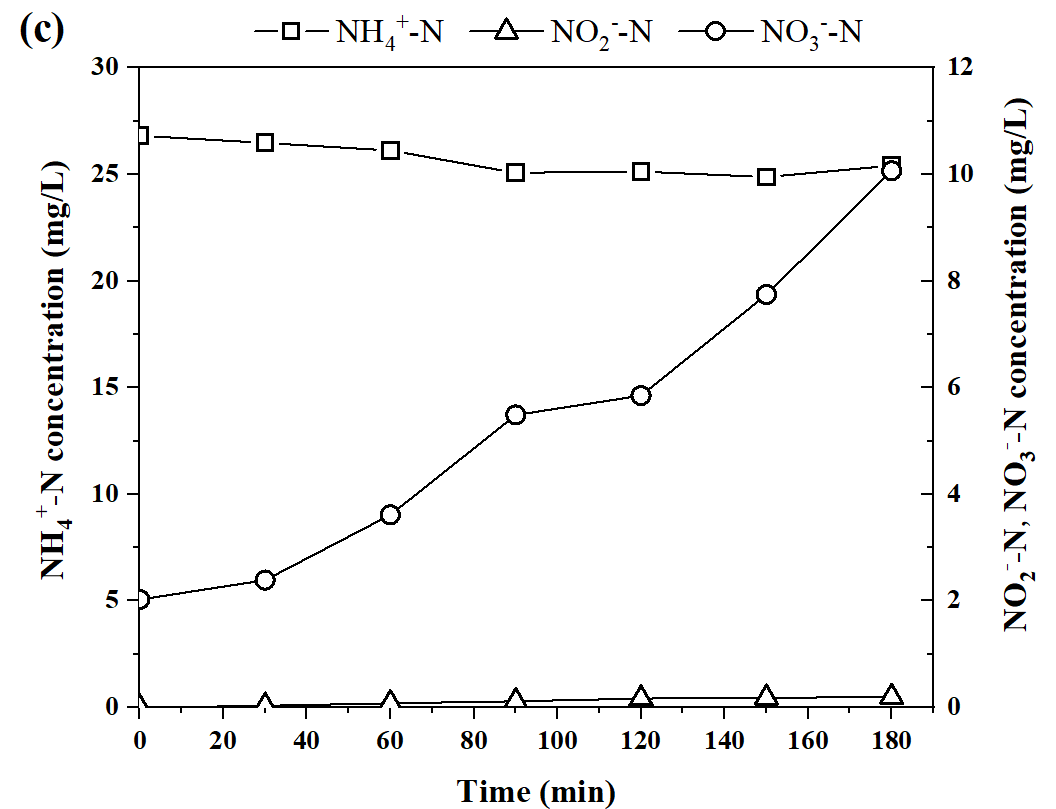

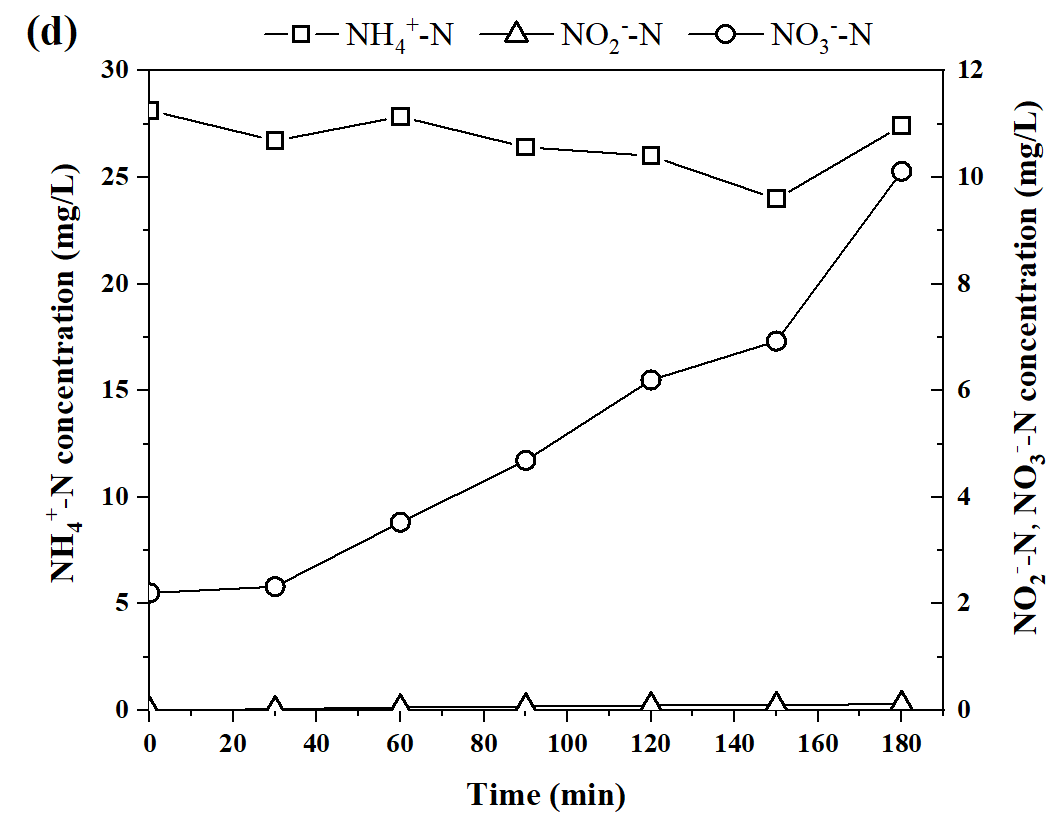


**Figure S3** Profiles of NH4+-N, NO2--N and NO3--N during nitrification activity batch tests with the sludge collected from (a) R0, (b) R1, (c) R2, and (d) R3.


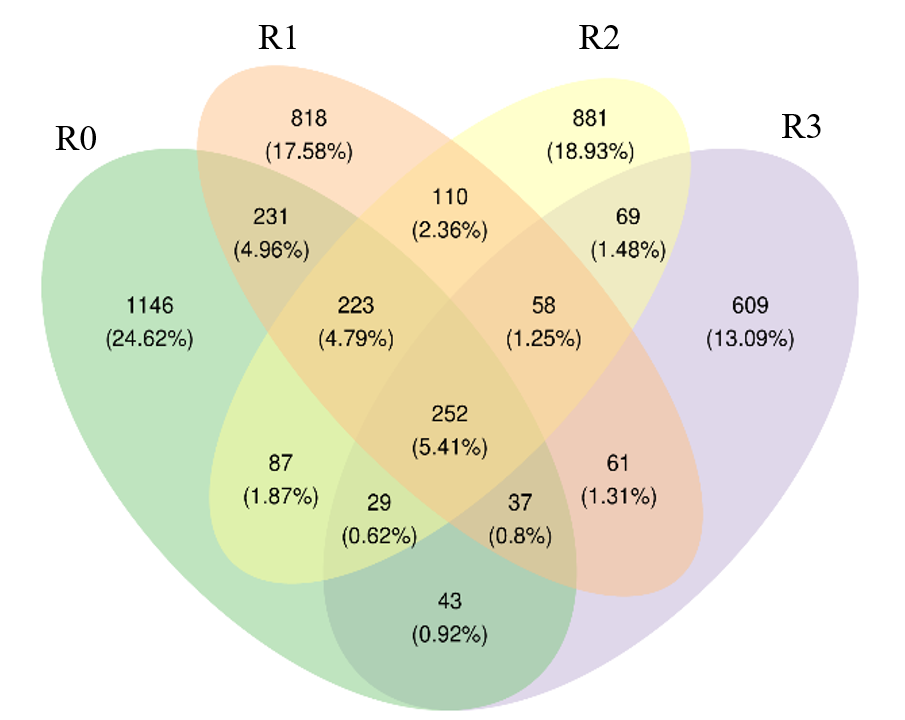


**Figure S4** Common and unique ASVs in different samples.

**Table S1** Composition and concentration of trace elements in synthetic wastewater.

| Composition | Concentration (mg/L) |
| --- | --- |
| Yeast extract | 8 |
| MgCl2·6H2O | 219 |
| MgSO4·7H2O | 14 |
| KCl | 98 |
| CaCl2 | 46 |
| H3BO3 | 0.061 |
| Na2MoO4·2H2O | 0.031 |
| KI | 0.015 |
| CuSO4·5H2O | 0.061 |
| Co(NO3)2·6H2O | 0.075 |
| ZnSO4·7H2O | 0.3 |
| MnSO4·H2O | 0.34 |
| FeSO4·7H2O | 0.3 |

**Table S2** Alpha diversity indices.

| **Sample** | **ASVs** | **Observed species** | **Good's coverage** | **Shannon** | **Gini-Simpson** | **Chao1** |
| --- | --- | --- | --- | --- | --- | --- |
| R0 | 1158 | 1155 | 0.997 | 3.908 | 0.860 | 1259 |
| R1 | 1709 | 1715 | 0.995 | 5.275 | 0.858 | 1868 |
| R2 | 1790 | 1779 | 0.995 | 5.914 | 0.935 | 1949 |
| R3 | 2048 | 2053 | 0.997 | 6.648 | 0.961 | 2097 |
